# Supplementary material
Source: HighWire-hosted journal article supplement (https://www.jrheum.org/highwire/filestream/33373/field_highwire_adjunct_files/0/170681_Data_Suppl.pdf)
Supplement: 170681_Data_Suppl.pdf [file 170681_Data_Suppl.pdf]

ONLINE SUPPLEMENTARY DATA

**Supplementary Figure 1.** Illustrations of synovial thickening in knee (A), wrist (B), tibiotalar joint (C) and subtalar joint (D). Arrowheads indicate synovial thickening as hypoechoic material confined within the joint capsule.

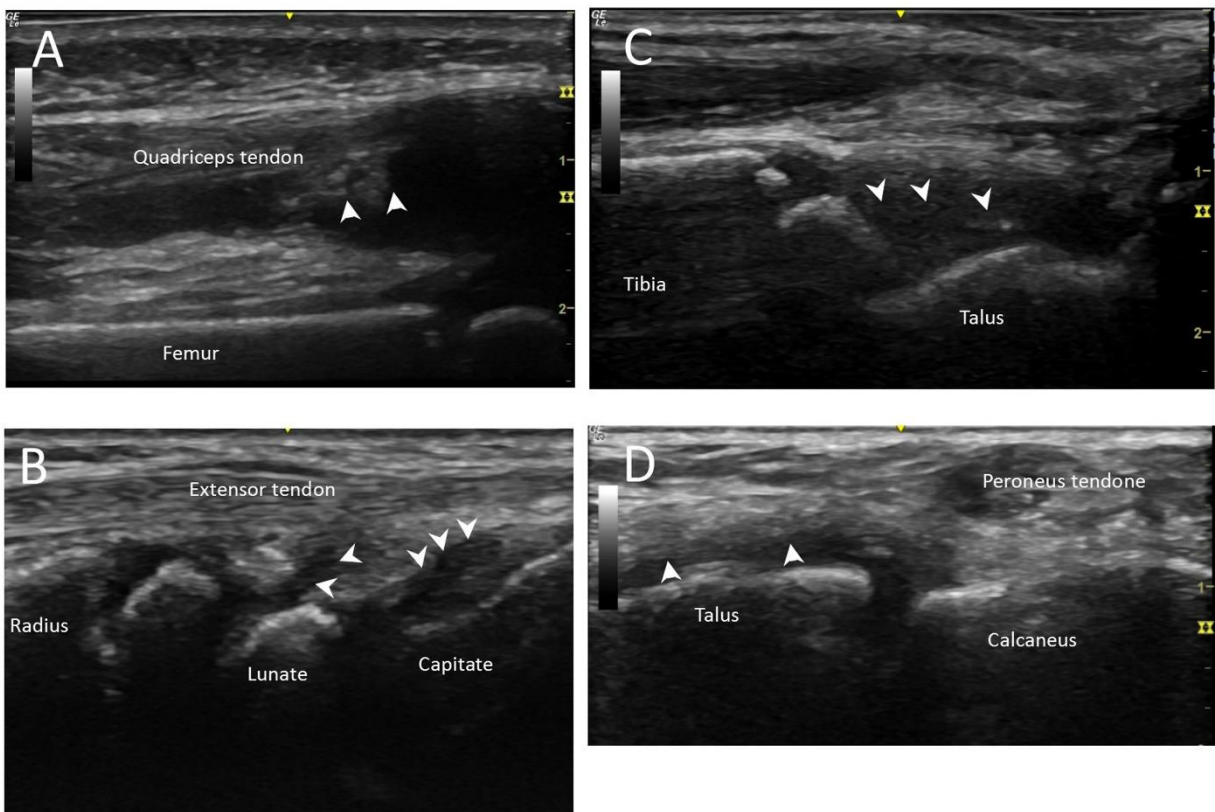

**Supplementary Table 1.** Ultrasound and clinical follow-up findings for 40 patients with clinically inactive disease at baseline.

| Subject | Baseline US findings | Follow-up ultrasound visit  |            |                             | Total duration of follow-up since baseline (months) | Clinical disease course (arthritis) (time to flare since baseline US) |
|---------|----------------------|-----------------------------|------------|-----------------------------|-----------------------------------------------------|-----------------------------------------------------------------------|
|         |                      | Ultrasound findings         | CID or not | Time from baseline (months) |                                                     |                                                                       |
| 1       | Normal               | T (subtalar)                | Yes        | 7                           | 19                                                  | No flare                                                              |
| 2       | Normal               | Normal                      | Yes        | 3                           | 19                                                  | No flare                                                              |
| 3       | Normal               | Normal                      | Yes        | 3                           | 23                                                  | Flare, knee (8.3 mo)                                                  |
| 4       | PD (wrist)           | Normal                      | Yes        | 16                          | 16                                                  | No flare                                                              |
| 5       | Normal               | Normal                      | Yes        | 5                           | 22                                                  | Flare, knee (17.0 mo)                                                 |
| 6       | Normal               | PD (wrist)                  | Yes        | 3                           | 23                                                  | No flare                                                              |
| 7       | Normal               | PD (wrist)                  | Yes        | 3                           | 23                                                  | Flare, knee, subtalar, tibiotalar (7.1 mo)                            |
| 8       | Normal               | E (knee), T (subtalar)      | Yes        | 2                           | 24                                                  | Flare, wrist (22.4 mo)                                                |
| 9       | Normal               | Normal                      | Yes        | 8                           | 24                                                  | Flare, knee (23.7 mo)                                                 |
| 10      | Normal               | Normal                      | Yes        | 4                           | 23                                                  | Flare, knee (11.1 mo)                                                 |
| 11      | T (subtalar)         | E (subtalar), T (subtalar)  | Yes        | 6                           | 21                                                  | No flare                                                              |
| 12      | Normal               | T (subtalar), PD (subtalar) | Yes        | 6                           | 21                                                  | Flare, knee (10.0 mo)                                                 |
| 13      | Normal               | T (subtalar), PD (subtalar) | No (hip)   | 14                          | 23                                                  | Flare, hip (8.0 mo)                                                   |

|    |                                |                             |                       |    |    |                                         |
|----|--------------------------------|-----------------------------|-----------------------|----|----|-----------------------------------------|
| 14 | Normal                         | T (subtalar), E (subtalar)  | Yes                   | 6  | 22 | Flare, knee (16.0 mo)                   |
| 15 | PD (knee)                      | T (subtalar)                | No (knee)             | 4  | 19 | Flare, knee (6.0 mo)                    |
| 16 | PD (wrist, subtalar), E (knee) | Normal                      | Yes                   | 6  | 23 | No flare                                |
| 17 | E (knee)                       | T (subtalar)                | Yes                   | 3  | 23 | Flare, knee (15.7 mo)                   |
| 18 | PD (subtalar)                  | PD (subtalar)               | Yes                   | 10 | 23 | Flare, knee, wrist (20.3 mo)            |
| 19 | PD (wrist)                     | Normal                      | Yes                   | 15 | 20 | No flare                                |
| 20 | T (subtalar)                   | T (subtalar)                | Yes                   | 6  | 20 | Flare, knee (8.7 mo)                    |
| 21 | Normal                         | E (knee)                    | Yes                   | 3  | 16 | No flare                                |
| 22 | Normal                         | Normal                      | Yes                   | 4  | 23 | Flare, knee (22.6mo)                    |
| 23 | Normal                         | Normal                      | Yes                   | 5  | 24 | No flare                                |
| 24 | PD (tibiotalar)                | Tendon (wrist)              | Yes                   | 3  | 24 | No flare                                |
| 25 | PD (wrist)                     | T (subtalar), PD (subtalar) | No (knee, tibiotalar) | 8  | 19 | Flare, knee, tibiotalar (5.8 mo)        |
| 26 | Normal                         | Normal                      | Yes                   | 4  | 21 | No flare                                |
| 28 | Normal                         | Normal                      | Yes                   | 12 | 22 | Flare, knee (3.7 mo)                    |
| 29 | PD (wrist)                     | Normal                      | Yes                   | 8  | 22 | Flare, knee, tibiotalar, wrist (2.6 mo) |

|    |                                                  |                                   |                 |     |    |                                             |
|----|--------------------------------------------------|-----------------------------------|-----------------|-----|----|---------------------------------------------|
| 30 | E (subtalar), T (subtalar), PD (tibiotalar)      | E (subtalar), T (subtalar)        | Yes             | 6   | 23 | Flare, knee, subtalar, tibiotalar (14.3 mo) |
| 31 | Normal                                           | N/A                               | N/A             | N/A | 22 | No flare                                    |
| 32 | PD (wrist)                                       | PD (wrist), T (subtalar)          | No (tibiotalar) | 8   | 21 | Flare, tibiotalar (12.0 mo)                 |
| 34 | PD (wrist, subtalar)                             | Normal                            | Yes             | 11  | 11 | No flare                                    |
| 35 | PD (subtalar)                                    | Normal                            | No (knee)       | 5   | 12 | Flare, knee (4.4 mo)                        |
| 37 | Normal                                           | T (subtalar), PD (subtalar)       | Yes             | 7   | 21 | Flare, knee (17.9 mo)                       |
| 38 | E (subtalar)                                     | T (subtalar), PD (subtalar)       | Yes             | 4   | 22 | No flare                                    |
| 39 | E (subtalar), T (subtalar), PD (wrist, subtalar) | N/A                               | N/A             | N/A | 20 | Flare, knee, tibiotalar (3.6 mo)            |
| 40 | E (knee), PD (wrist)                             | E (knee), T (subtalar), PD (knee) | Yes             | 3   | 24 | No flare                                    |
| 41 | Normal                                           | Normal                            | Yes             | 4   | 20 | No flare                                    |
| 45 | Normal                                           | Normal                            | Yes             | 3   | 3  | No flare                                    |
| 46 | Normal                                           | E (knee)                          | No (TMJ)        | 3   | 19 | Flare, TMJ (3.0 mo)                         |

E: effusion, PD: power Doppler, US: ultrasound; T: thickening, Tendon: tenosynovitis, N/A: not available, TMJ: temporomandibular joint; CID: clinically inactive disease.

**Supplementary Table 2.** Detailed timing and joints in patients with arthritis flares.

| Subject | Left wrist | Right wrist | Left knee | Right knee | Left tibiotalar | Right tibiotalar | Left subtalar | Right subtalar | Time to flare since baseline (months) |
|---------|------------|-------------|-----------|------------|-----------------|------------------|---------------|----------------|---------------------------------------|
| 03      | 0          | 0           | 0         | 1          | 0               | 0                | 0             | 0              | 8.3                                   |
| 07      | 0          | 0           | 0         | 1          | 0               | 0                | 0             | 0              | 7.1                                   |
| 08      | 1          | 1           | 0         | 0          | 0               | 0                | 0             | 0              | 22.4                                  |
| 09      | 0          | 0           | 0         | 1          | 0               | 0                | 0             | 0              | 23.7                                  |
| 10      | 0          | 0           | 1         | 0          | 0               | 0                | 0             | 0              | 11.1                                  |
| 12      | 0          | 0           | 0         | 1          | 0               | 0                | 0             | 0              | 14                                    |
| 14      | 0          | 0           | 0         | 1          | 0               | 0                | 0             | 0              | 12.5                                  |
| 17      | 0          | 0           | 1         | 0          | 0               | 0                | 0             | 0              | 15.7                                  |
| 18      | 0          | 0           | 1         | 1          | 0               | 0                | 0             | 0              | 20.3                                  |
| 20      | 0          | 0           | 1         | 1          | 0               | 0                | 0             | 0              | 8.7                                   |
| 22      | 0          | 0           | 1         | 1          | 0               | 0                | 0             | 0              | 22.6                                  |
| 25      | 0          | 0           | 0         | 1          | 0               | 1                | 0             | 0              | 5.8                                   |
| 28      | 0          | 0           | 0         | 1          | 0               | 0                | 0             | 0              | 3.7                                   |
| 29      | 0          | 0           | 0         | 0          | 0               | 1                | 0             | 0              | 2.6                                   |
| 30      | 0          | 0           | 1         | 0          | 1               | 0                | 1             | 0              | 14.3                                  |

---

|    |   |   |   |   |   |   |   |   |      |
|----|---|---|---|---|---|---|---|---|------|
| 35 | 0 | 0 | 0 | 1 | 0 | 0 | 0 | 0 | 4.4  |
| 37 | 0 | 0 | 1 | 0 | 0 | 0 | 0 | 0 | 17.9 |
| 39 | 0 | 0 | 1 | 1 | 0 | 1 | 0 | 0 | 3.6  |

---

0: normal; 1: active arthritis.
